# Supplementary material for: Subclinical Hypothyroidism in Polycystic Ovary Syndrome: A Systematic Review and Meta-Analysis
Source: Front Endocrinol (Lausanne). 2018 Nov 27;9:700. doi: 10.3389/fendo.2018.00700 (PMC6277795; doi:10.3389/fendo.2018.00700)
Supplement: Supplementary Table 1 — Search strategy and selected keywords. [file Table_1.doc]

Supplementary Material

# Title: Subclinical hypothyroidism in polycystic ovary syndrome: a systematic review and meta-analysis

Xiaohong Ding1†, Lili Yang2†, Jian Wang3, Rong Tang4, Qianqian Chen1, Jiexue Pan1, Haiyan Yang1, Xia Chen1, Zimiao Chen5*and Liangshan Mu1*

1Reproductive Medicine Center, The First Affiliated Hospital of Wenzhou Medical University, Wenzhou 325000, People’s Republic of China;

2 Department of Radiology, The Second Affiliated Hospital and Yuying Children’s Hospital of Wenzhou Medical University, Wenzhou 325000, People’s Republic of China;

3 Department of Hand Surgery and Peripheral Neurosurgery, The First Affiliated Hospital of Wenzhou Medical University, Wenzhou 325000, People’s Republic of China ;

4 The Second School of Medicine, Wenzhou Medical University, Wenzhou 325000, People’s Republic of China ;

5 Department of Endocrinology, The First Affiliated Hospital of Wenzhou Medical University, Wenzhou 325000, People’s Republic of China;

†, These two authors contributed equally to this article.

*, These two authors are corresponding authors.

**Correspondence to:** Liangshan Mu, M.D., Reproductive Medicine Center, The First Affiliated Hospital of Wenzhou Medical University, No.96 Fuxue Road, Wenzhou 325000, People’s Republic of China; E-mail: [liangshanmu@hotmail.com](mailto:liangshanmu@hotmail.com); Zimiao Chen, M.D., Department of Endocrinology, The First Affiliated Hospital of Wenzhou Medical University, No.96 Fuxue Road, Wenzhou 325000, People’s Republic of China; E-mail: zimiaochen@163.com;

**Supplementary Table I : Search strategy and selected keywords**

((Polycystic Ovary Syndrome OR Stein Leventhal Syndrome OR Sclerocystic Ovari* OR PCOS OR polycystic ovary disease OR PCOD)) AND (subclinical hypothyroidism OR SHT OR SCH). The references of the identified studies were also checked.
